# Supplementary material for: A human PET study of [11C]HMS011, a potential radioligand for AMPA receptors
Source: Springer Nature journal article supplement (doi:10.1186/s13550-017-0313-0), 2017-08-16
Supplement: MOESM1 [file 14220166]

## **Additional file**

### **Receptor Binding assay**

We performed a binding assay using human brain homogenates in order to determine the affinity of [<sup>11</sup>C]HMS011 for human AMPA receptors.

**Methods:** Post-mortem human brains were obtained from autopsies carried out at the Fukushima Hospital. Frozen tissues derived from the frontal cortex of a healthy subject were homogenized in 50mM Tris-HCl buffer, pH 7.4, containing protease inhibitor cocktail (cOmplete™, EDTA-free; Roche), and stored at -80° pending analyses. To evaluate the radioligand binding and its homologous blockade, these homogenates (200mg tissue) were incubated with 5 nM [<sup>11</sup>C]HMS011 in the absence or presence of unlabeled HMS011 at varying concentrations ranging from 10<sup>-11</sup> to 10<sup>-6</sup> M in Tris-HCl buffer, pH 7.4, for 30 min at room temperature. These radioligand concentrations were determined in consideration of the radioactive half-life of <sup>11</sup>C (approximately 20 min). Non-specific binding of [<sup>11</sup>C]HMS011 was determined in the presence of 5 x 10<sup>-7</sup> M HMS011. Samples were run in quadruplicates, and specific radioligand binding was determined as pmol/g tissue. Inhibition constant ( $K_i$ ) and percentage of displacement were determined by using a non-linear regression fit to a concentration-binding plot based on one-site and two-site binding models derived from the Cheng-Prusoff equation with GraphPad Prism version 5.0 (GraphPad Software), followed by *F*-test for the model selection. In a one-site homologous blockade model,

dissociation constant ( $K_D$ ) and maximum number of binding sites ( $B_{max}$ ) were calculated using the following equations:

$$K_D = K_i = IC_{50} - [Radioligand] \quad (1)$$

$$B_{max} = \frac{Top-Bottom}{[Radioligand]/(K_D+[Radioligand])} \quad (2)$$

where  $IC_{50}$  and  $[Radioligand]$  are concentration of the competitor inducing 50% inhibition and radioligand concentration, respectively, and Top and Bottom are upper and lower plateaus of the plot curve, respectively.

### **Results:**

Total (specific + non-specific) radioligand binding and its blockade are depicted in Figure S5. Specific [ $^{11}C$ ]HMS011 binding in the human frontal cortex tissue was homologously inhibited by non-labelled HMS011 in a concentration-dependent fashion, and the blocking curve was demonstrated by a one-site model, indicating the presence of binding sites for [ $^{11}C$ ]HMS011 with 15.34 nM of  $K_i$  ( $= K_D$ ), which was slightly larger than the  $K_i$  of this compound in rat brain samples [1].  $B_{max}$  value was estimated to be 18.82 pmol/g. Based on these results obtained by binding assay and other parameters ( $f_p=0.073$  and  $V_{ND}=0.87$ ),  $BP_{ND}$  value of [ $^{11}C$ ]HMS011 to human AMPA receptors is estimated to be about 0.1. This  $BP_{ND}$  value is similar to those calculated by  $MRTM_O$  in the present PET study, supporting the low-level specific radioligand binding.

## References

1. Oi N, Tokunaga M, Suzuki M, Nagai Y, Nakatani Y, Yamamoto N, et al.  
Development of Novel PET Probes for Central  
2-Amino-3-(3-hydroxy-5-methyl-4-isoxazolyl)propionic Acid Receptors. *J. Med. Chem.*  
2015;58:8444–62.

## Additional file

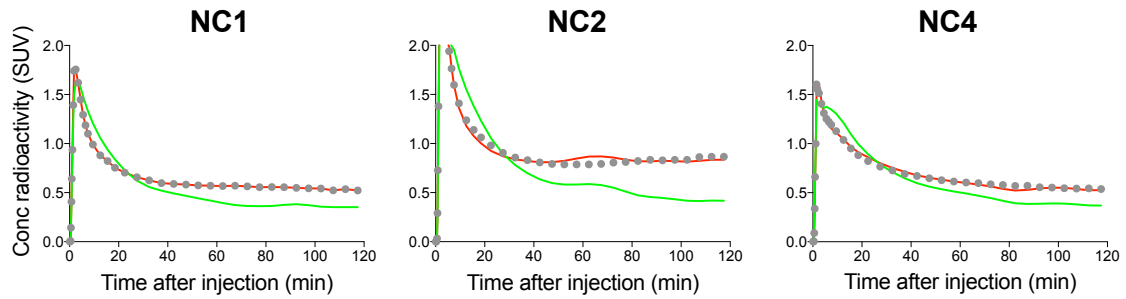

**Figure S1** Fitting curves of one-tissue compartment model (green lines) and two-tissue compartment model (red lines) on time-activity curves in the frontal cortex (filled circles). Two-tissue compartment model provided better fitting than one-tissue compartment model for all 3 subjects.

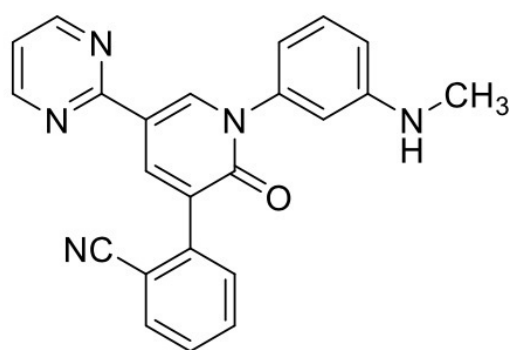

HMS011

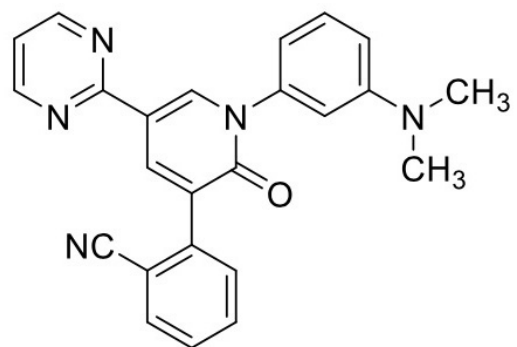

Metabolite-4

**Figure S2** A chemical structure of HMS011 and a proposed chemical structure of the fourth metabolite.

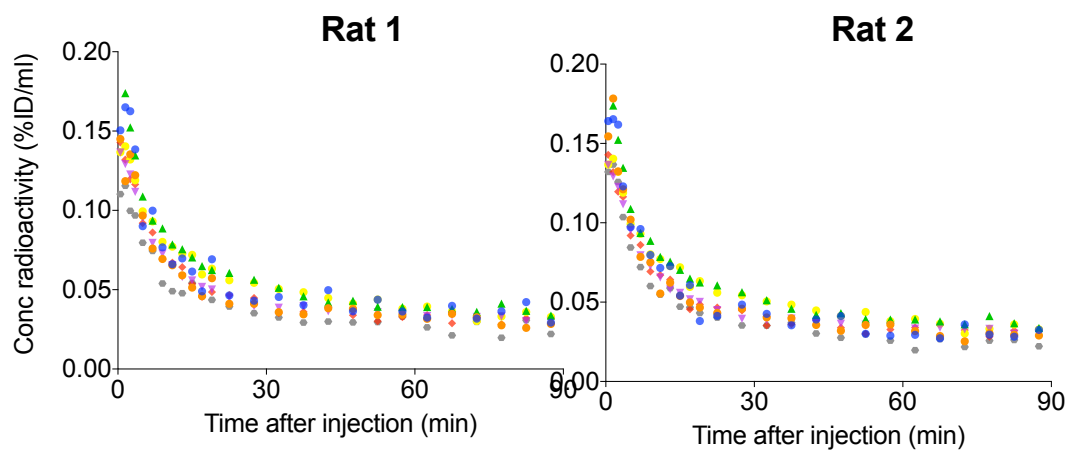

**Figure S3** Average time-course of radioactivity in medial prefrontal cortex (blue), striatum (orange), cerebellum (green), hippocampus (purple), neocortex (yellow), thalamus (red), and brain stem (gray) after injection of [ $^{11}\text{C}$ ]Metabolite-4 in two wild-type rats.

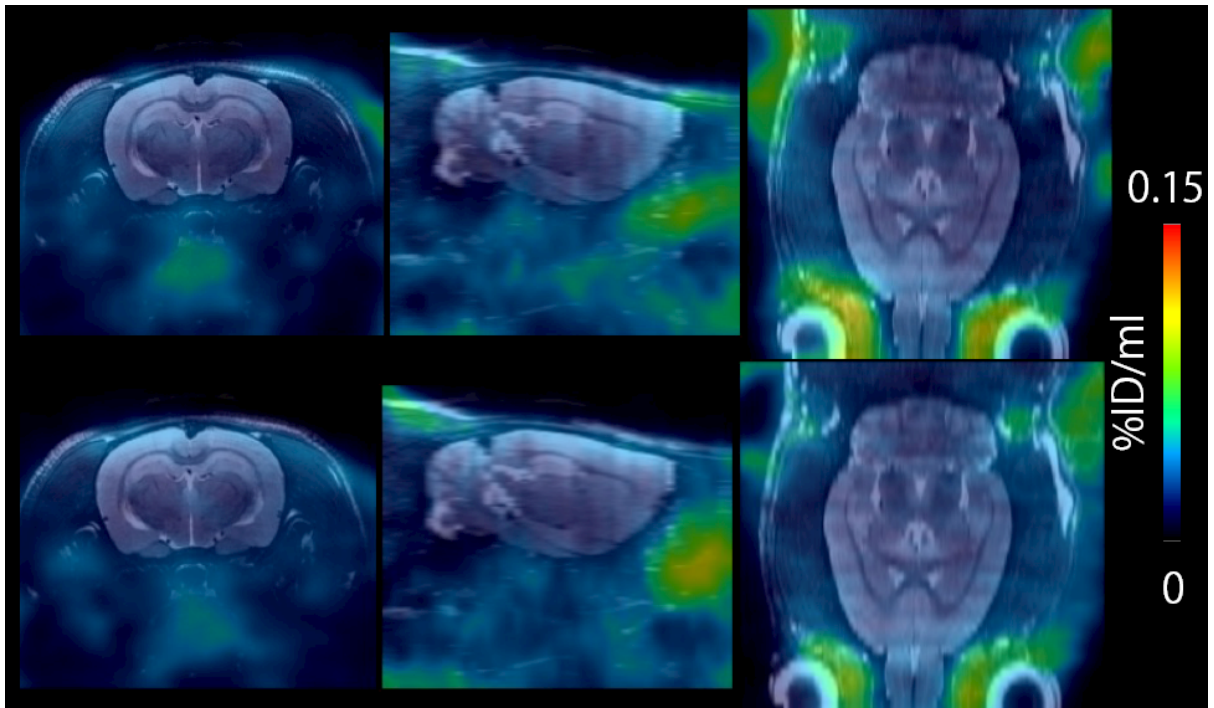

**Figure S4.** PET images (0–90 min) and time activity curves of [ $^{11}\text{C}$ ]Metabolite-4 in two wild-type rats (weight: 636 and 557 g and dose: 168.6 and 167.9 MBq for rats on the top and bottom rows, respectively).

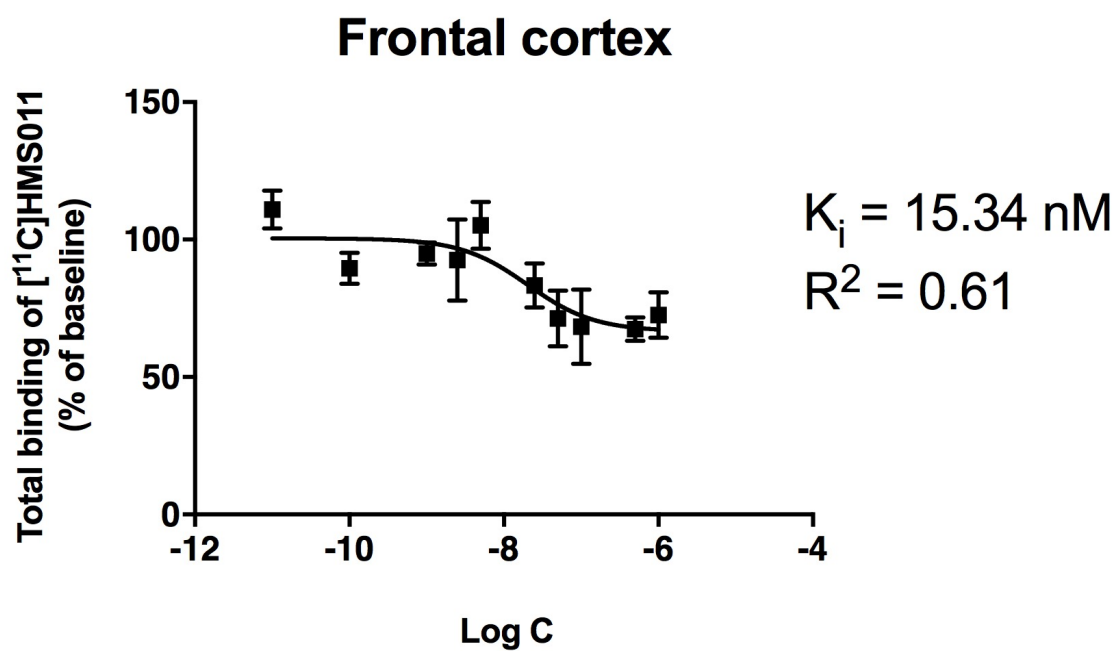

**Figure S5.** Binding of  $[^{11}\text{C}]\text{HMS011}$  in homogenates derived from the human frontal cortex. The specific binding of  $[^{11}\text{C}]\text{HMS011}$  was blocked by non-labeled HMS011. This homologous blockade was described by a one-site model, and parameters resulting from a curve fit are indicated in the graph. Data are presented as mean  $\pm$  standard error.
